# Supplementary material for: High Rates of Three Common GJB2 Mutations c.516G>C, c.-23+1G>A, c.235delC in Deaf Patients from Southern Siberia Are Due to the Founder Effect
Source: MDPI journal article supplement (doi:10.3390/genes11070833), 2020-07-21
Supplement: s1 [file s1]

**Table S2. The allelic frequencies of STRs (D13S1316, D13S141, D13S175, D13S1853, D13S143, D13S1275, D13S292) and SNPs (rs747931, rs5030700, rs3751385, rs2274083, rs2274084, rs1411911768, rs9552101, rs117685390, rs877098) in deaf patients homozygous for mutations c.516G>C, c.-23+1G>A or c.235delC and in the control samples (Tuvinians and Altaians).**

| Tuvinians             |        |                                     |       |                          |               |                                     |        |                          |               | Altaians                            |                                     |        |               |               |                                     |
|-----------------------|--------|-------------------------------------|-------|--------------------------|---------------|-------------------------------------|--------|--------------------------|---------------|-------------------------------------|-------------------------------------|--------|---------------|---------------|-------------------------------------|
| Genotype              |        | c.516G>C / c.516G>C (n=14)          |       |                          |               | c.-23+1G>A / c.-23+1G>A (n=6)       |        |                          |               | Control<br>(n=62)                   | c.235delC / c.235delC (n=4)         |        |               |               | Control<br>(n=55)                   |
| Markers               | Allele | Number of<br>alleles /<br>frequency | $X^2$ | $p$                      | $\delta$      | Number<br>of alleles /<br>frequency | $X^2$  | $p$                      | $\delta$      | Number of<br>alleles /<br>frequency | Number<br>of alleles /<br>frequency | $X^2$  | $p$           | $\delta$      | Number of<br>alleles /<br>frequency |
| D13S1316 <sup>a</sup> | 259    | 0 / 0                               | -     | -                        | 0.0000        | 1 / 0.0833                          | 2.1    | 0.0882                   | 0.0833        | 0 / 0                               | 0 / 0                               | -      | -             | 0.0000        | 0 / 0                               |
|                       | 263    | 0 / 0                               | 0.42  | 0.2881                   | -0.0508       | 3 / 0.25                            | 4.3    | 0.0329                   | 0.2119        | 6 / 0.0484                          | 0 / 0                               | 0.086  | 0.6995        | -0.0476       | 5 / 0.0455                          |
|                       | 265    | 0 / 0                               | 0.096 | 0.4389                   | -0.0333       | 0 / 0                               | 0.069  | 0.6881                   | -0.0333       | 4 / 0.0323                          | 0 / 0                               | -      | -             | 0.0000        | 0 / 0                               |
|                       | 267    | 8 / 0.2857                          | 32.00 | < <b>10<sup>-6</sup></b> | -3.2177       | 8 / 0.6667                          | 1      | 0.1550                   | -0.9683       | 103 / 0.8306                        | 8 / 1                               | 0.32   | 1.0000        | <b>1.0000</b> | 95 / 0.8636                         |
|                       | 269    | 20 / 0.7143                         | 71.00 | < <b>10<sup>-7</sup></b> | <b>0.7023</b> | 0 / 0                               | 0.0089 | 0.6255                   | -0.0420       | 5 / 0.0403                          | 0 / 0                               | 3      | 0.9322        | -0.0092       | 1 / 0.0091                          |
|                       | 271    | 0 / 0                               | 0.42  | 0.2881                   | -0.0508       | 0 / 0                               | 0.0019 | 0.5682                   | -0.0508       | 6 / 0.0484                          | 0 / 0                               | 0.0038 | 0.5601        | -0.0784       | 8 / 0.0727                          |
|                       | 273    | 0 / 0                               | -     | -                        | 0.0000        | 0 / 0                               | -      | -                        | 0.0000        | 0 / 0                               | 0 / 0                               | 3      | 0.9322        | -0.0092       | 1 / 0.0091                          |
|                       | Total  | 28 / -                              |       |                          |               | 12 / -                              |        |                          |               | 124 / -                             | 8 / -                               |        |               |               | 110 / -                             |
| rs747931              | C      | 0 / 0                               | 11    | < <b>10<sup>-4</sup></b> | -0.5500       | 12 / 1                              | 16     | 1                        | <b>1.0000</b> | 44 / 0.3548                         | 0 / 0                               | 1.2    | 0.1338        | -0.3012       | 25 / 0.2315                         |
|                       | T      | 26 / 1                              | 11    | 1                        | <b>1.0000</b> | 0 / 0                               | 16     | < <b>10<sup>-4</sup></b> | -1.8182       | 80 / 0.6452                         | 8 / 1                               | 1.2    | 1             | <b>1.0000</b> | 83 / 0.7685                         |
|                       | Total  | 26 / -                              |       |                          |               | 12 / -                              |        |                          |               | 124 / -                             | 8 / -                               |        |               |               | 105 / -                             |
| D13S141 <sup>a</sup>  | 120    | 0 / 0                               | 0.67  | 0.8158                   | -0.0081       | 0 / 0                               | 2.1    | 0.9118                   | -0.0081       | 1 / 0.0081                          | 0 / 0                               | -      | -             | 0.0000        | 0 / 0                               |
|                       | 124    | 28 / 1                              | 2.30  | <b>0.0100</b>            | <b>1.0000</b> | 12 / 1                              | 0.54   | 1                        | <b>1.0000</b> | 110 / 0.8871                        | 8 / 1                               | 0.88   | 0.1462        | <b>1.0000</b> | 109 / 0.9909                        |
|                       | 126    | 0 / 0                               | 1.80  | 0.0781                   | -0.1071       | 0 / 0                               | 0.35   | 0.3140                   | -0.1071       | 12 / 0.0968                         | 0 / 0                               | -      | -             | 0.0000        | 0 / 0                               |
|                       | 128    | 0 / 0                               | 0.67  | 0.8158                   | -0.0081       | 0 / 0                               | 2.1    | 0.9118                   | -0.0081       | 1 / 0.0081                          | 0 / 0                               | 0.88   | 0.1462        | -0.0092       | 1 / 0.0091                          |
|                       | Total  | 28 / -                              |       |                          |               | 12 / -                              |        |                          |               | 124 / -                             | 8 / -                               |        |               |               | 110 / -                             |
| rs5030700             | C      | 22 / 1                              | -     | -                        | -             | 10 / 1                              | -      | -                        | -             | 122 / 1                             | 4 / 1                               | 5.9    | 1.0010        | <b>1.0000</b> | 101 / 0.9902                        |
|                       | T      | 0 / 0                               | -     | -                        | -             | 0 / 0                               | -      | -                        | -             | 0 / 0                               | 0 / 0                               | 5.9    | 0.9623        | -0.0099       | 1 / 0.0098                          |
|                       | Total  | 22 / -                              |       |                          |               | 12 / -                              |        |                          |               | 122 / -                             | 8 / -                               |        |               |               | 102 / -                             |
| rs3751385             | C      | 26 / 1                              | 7.2   | 1                        | <b>1.0000</b> | 12 / 1                              | 2.8    | 1                        | <b>1.0000</b> | 90 / 0.7377                         | 8 / 1                               | 2.6    | 1             | <b>1.0000</b> | 72 / 0.6545                         |
|                       | T      | 0 / 0                               | 7.2   | <b>0.0009</b>            | -0.3556       | 0 / 0                               | 2.8    | 0.0321                   | -0.3556       | 32 / 0.2621                         | 0 / 0                               | 2.6    | <b>0.0396</b> | -0.5278       | 38 / 0.3455                         |
|                       | Total  | 26 / -                              |       |                          |               | 12 / -                              |        |                          |               | 122 / -                             | 8 / -                               |        |               |               | 110 / -                             |
| rs2274083             | A      | 28 / 1                              | 1.1   | 1                        | <b>1.0000</b> | 12 / 1                              | 0.13   | 1                        | <b>1.0000</b> | 115 / 0.9274                        | 8 / 1                               | 0.096  | 1             | <b>1.0000</b> | 99 / 0.9                            |
|                       | G      | 0 / 0                               | 1.1   | 0.1513                   | -0.0783       | 0 / 0                               | 0.13   | 0.4239                   | -0.0783       | 9 / 0.0726                          | 0 / 0                               | 0.096  | 0.4456        | -0.1111       | 11 / 0.1                            |
|                       | Total  | 28 / -                              |       |                          |               | 12 / -                              |        |                          |               | 124 / -                             | 8 / -                               |        |               |               | 110 / -                             |

Table S2 (continued)

| Genotype              | Tuvinians                  |        |                               |                           |               |                               |                               |                |               | Altaians       |                               |                               |                |               |                |
|-----------------------|----------------------------|--------|-------------------------------|---------------------------|---------------|-------------------------------|-------------------------------|----------------|---------------|----------------|-------------------------------|-------------------------------|----------------|---------------|----------------|
|                       | c.516G>C / c.516G>C (n=14) |        |                               |                           |               | c.-23+1G>A / c.-23+1G>A (n=6) |                               |                |               | Control (n=62) | c.235delC / c.235delC (n=4)   |                               |                |               | Control (n=55) |
|                       | Markers                    | Allele | Number of alleles / frequency | X <sup>2</sup>            | p             | δ                             | Number of alleles / frequency | X <sup>2</sup> | p             | δ              | Number of alleles / frequency | Number of alleles / frequency | X <sup>2</sup> | p             | δ              |
| rs2274084             | A                          | 0 / 0  | 6.3                           | <b>0.0017</b>             | -0.2917       | 0 / 0                         | 2.2                           | 0.0550         | -0.2917       | 28 / 0.2258    | 0 / 0                         | 2                             | 0.0658         | -0.4286       | 33 / 0.3       |
|                       | G                          | 28 / 1 | 6.3                           | 1                         | <b>1.0000</b> | 12 / 1                        | 2.2                           | 1              | <b>1.0000</b> | 96 / 0.7742    | 8 / 1                         | 2                             | 1              | <b>1.0000</b> | 77 / 0.7       |
|                       | Total                      | 28 / - |                               |                           |               | 12 / -                        |                               |                |               | 124 / -        | 8 / -                         |                               |                |               | 110 / -        |
| rs1411911768          | C                          | 0 / 0  | 110                           | < <b>10<sup>-23</sup></b> | -16.7143      | 12 / 1                        | 0.026                         | 1              | <b>1.0000</b> | 117 / 0.9435   | 8 / 1                         | 1.1                           | 1              | <b>1.0000</b> | 108 / 0.9818   |
|                       | T                          | 28 / 1 | 110                           | < <b>10<sup>-23</sup></b> | <b>1.0000</b> | 0 / 0                         | 0.026                         | 0.5158         | -0.0598       | 7 / 0.0565     | 0 / 0                         | 1.1                           | 0.8685         | -0.0185       | 2 / 0.0182     |
|                       | Total                      | 28 / - |                               |                           |               | 12 / -                        |                               |                |               | 124 / -        | 8 / -                         |                               |                |               | 110 / -        |
| rs9552101             | G                          | 28 / 1 | 0.65                          | 1.022                     | <b>1.0000</b> | 12 / 1                        | 2.1                           | 1.0040         | <b>1.0000</b> | 121 / 0.9918   | 8 / 1                         | -                             | -              | -             | 110 / 1        |
|                       | C                          | 0 / 0  | 0.65                          | 0.8133                    | -0.0083       | 0 / 0                         | 2.1                           | 0.9104         | -0.0083       | 1 / 0.0082     | 0 / 0                         | -                             | -              | -             | 0 / 0          |
|                       | Total                      | 28 / - |                               |                           |               | 12 / -                        |                               |                |               | 122 / -        | 8 / -                         |                               |                |               | 110 / -        |
| rs117685390           | T                          | 28 / 1 | 7.1                           | 1                         | <b>1.0000</b> | 6 / 1                         | 0.8                           | 1              | <b>1.0000</b> | 92 / 0.7541    | 8 / 1                         | 2.9                           | 1              | <b>1.0000</b> | 70 / 0.6364    |
|                       | C                          | 0 / 0  | 7.1                           | <b>0.0009</b>             | -0.3261       | 0 / 0                         | 0.8                           | 0.1941         | -0.3261       | 30 / 0.2459    | 0 / 0                         | 2.9                           | <b>0.0321</b>  | -0.5714       | 40 / 0.3636    |
|                       | Total                      | 28 / - |                               |                           |               | 6 / -                         |                               |                |               | 122 / -        | 8 / -                         |                               |                |               | 110 / -        |
| rs877098              | C                          | 26 / 1 | 8.8                           | 1                         | <b>1.0000</b> | 11 / 0.9167                   | 1.6                           | 0.0985         | <b>0.7222</b> | 84 / 0.6885    | 0 / 0                         | 12                            | <b>0.0002</b>  | -2.0556       | 74 / 0.6727    |
|                       | T                          | 0 / 0  | 8.8                           | <b>0.0003</b>             | -0.4286       | 1 / 0.0833                    | 1.6                           | 0.0985         | -0.3095       | 36 / 0.2951    | 8 / 1                         | 12                            | 1              | <b>1.0000</b> | 36 / 0.3273    |
|                       | Total                      | 26 / - |                               |                           |               | 12 / -                        |                               |                |               | 122 / -        | 8 / -                         |                               |                |               | 110 / -        |
| D13S175 <sup>a</sup>  | 101                        | 0 / 0  | 0.83                          | 0.1879                    | -0.0690       | 0 / 0                         | 0.070                         | 0.4678         | -0.0690       | 8 / 0.0645     | 0 / 0                         | 0.023                         | 0.5193         | -0.0891       | 9 / 0.0818     |
|                       | 103                        | 0 / 0  | 13.00                         | < <b>10<sup>-4</sup></b>  | -0.5897       | 0 / 0                         | 5.2                           | 0.0054         | -0.5897       | 46 / 0.3710    | 0 / 0                         | 2.3                           | 0.0539         | -0.4667       | 35 / 0.3182    |
|                       | 105                        | 28 / 1 | 26.00                         | 1.0000                    | <b>1.0000</b> | 12 / 1                        | 11                            | 1.0000         | <b>1.0000</b> | 55 / 0.4435    | 8 / 1                         | 6.6                           | 1.0000         | <b>1.0000</b> | 51 / 0.4636    |
|                       | 107                        | 0 / 0  | 1.30                          | 0.1217                    | -0.0877       | 0 / 0                         | 0.20                          | 0.3839         | -0.0877       | 10 / 0.0806    | 0 / 0                         | 0.0038                        | 0.5601         | -0.0784       | 8 / 0.0727     |
|                       | 109                        | 0 / 0  | 0.67                          | 0.8158                    | -0.0081       | 0 / 0                         | 2.1                           | 0.9118         | -0.0081       | 1 / 0.0081     | 0 / 0                         | 0.21                          | 0.7523         | -0.0377       | 4 / 0.0364     |
|                       | 111                        | 0 / 0  | 0.01                          | 0.5405                    | -0.0248       | 0 / 0                         | 0.23                          | 0.7573         | -0.0248       | 3 / 0.0242     | 0 / 0                         | 1.1                           | 0.8685         | -0.0185       | 2 / 0.0182     |
|                       | 113                        | 0 / 0  | 0.67                          | 0.8158                    | -0.0081       | 0 / 0                         | 2.1                           | 0.9118         | -0.0081       | 1 / 0.0081     | 0 / 0                         | 3                             | 0.9322         | -0.0092       | 1 / 0.0091     |
|                       | Total                      | 28 / - |                               |                           |               | 12 / -                        |                               |                |               | 124 / -        | 8 / -                         |                               |                |               | 110 / -        |
| D13S1853 <sup>a</sup> | 196                        | 0 / 0  | -                             | -                         | 0.0000        | 0 / 0                         | -                             | -              | 0.0000        | 0 / 0          | 0 / 0                         | 3                             | 0.9322         | -0.0092       | 1 / 0.0091     |
|                       | 200                        | 0 / 0  | 0.06                          | 0.6645                    | -0.0164       | 0 / 0                         | 0.66                          | 0.8307         | -0.0164       | 2 / 0.0161     | 0 / 0                         | 3                             | 0.9322         | -0.0092       | 1 / 0.0091     |
|                       | 202                        | 0 / 0  | 11.00                         | 0.1513                    | -0.0783       | 0 / 0                         | 0.13                          | 0.4239         | -0.0783       | 9 / 0.0726     | 0 / 0                         | 0.70                          | 0.2151         | -0.2222       | 20 / 0.1818    |
|                       | 204                        | 28 / 1 | 0.31                          | 1.0000                    | 1.0000        | 12 / 1                        | 0.84                          | 1.0000         | <b>1.0000</b> | 107 / 0.8629   | 8 / 1                         | 1.6                           | 1.0000         | <b>1.0000</b> | 81 / 0.7364    |
|                       | 206                        | 0 / 0  | 0.24                          | 0.3559                    | -0.0420       | 0 / 0                         | 0.0089                        | 0.6255         | -0.0420       | 5 / 0.0403     | 0 / 0                         | 0.0016                        | 0.6036         | -0.0680       | 7 / 0.0636     |
|                       | 208                        | 0 / 0  | 0.67                          | 0.8158                    | -0.0081       | 0 / 0                         | 2.1                           | 0.9118         | -0.0081       | 1 / 0.0081     | 0 / 0                         | -                             | -              | 0.0000        | 0 / 0          |
|                       | Total                      | 28 / - |                               |                           |               | 12 / -                        |                               |                |               | 124 / -        | 8 / -                         |                               |                |               | 110 / -        |

Table S2 (continued)

|                       |        | Tuvinians                     |       |                            |               |                               |       |                            |               | Altaians                      |                               |       |                            |               |                               |
|-----------------------|--------|-------------------------------|-------|----------------------------|---------------|-------------------------------|-------|----------------------------|---------------|-------------------------------|-------------------------------|-------|----------------------------|---------------|-------------------------------|
| Genotype              |        | c.516G>C / c.516G>C (n=14)    |       |                            |               | c.-23+1G>A / c.-23+1G>A (n=6) |       |                            |               | Control (n=62)                | c.235delC / c.235delC (n=4)   |       |                            |               | Control (n=55)                |
| Markers               | Allele | Number of alleles / frequency | $X^2$ | $p$                        | $\delta$      | Number of alleles / frequency | $X^2$ | $p$                        | $\delta$      | Number of alleles / frequency | Number of alleles / frequency | $X^2$ | $p$                        | $\delta$      | Number of alleles / frequency |
| D13S143 <sup>a</sup>  | 123    | 0 / 0                         | 0.67  | 0.8158                     | -0.0081       | 0 / 0                         | 2.1   | 0.9118                     | -0.0081       | 1 / 0.0081                    | 0 / 0                         | -     | -                          | 0.0000        | 0 / 0                         |
|                       | 125    | 27 / 0.9643                   | 0.61  | 0.2267                     | <b>0.6593</b> | 12 / 1                        | 0.44  | 1.0000                     | <b>1.0000</b> | 111 / 0.8952                  | 8 / 1                         | 100   | -                          | -             | 110 / 1                       |
|                       | 127    | 0 / 0                         | 0.09  | 0.4389                     | -0.0333       | 0 / 0                         | 0.069 | 0.6881                     | -0.0333       | 4 / 0.0323                    | 0 / 0                         | -     | -                          | 0.0000        | 0 / 0                         |
|                       | 129    | 1 / 0.0357                    | 0.01  | 0.5476                     | -0.0220       | 0 / 0                         | 0.026 | 0.5158                     | -0.0598       | 7 / 0.0565                    | 0 / 0                         | -     | -                          | 0.0000        | 0 / 0                         |
|                       | 133    | 0 / 0                         | 0.67  | 0.8158                     | -0.0081       | 0 / 0                         | 2.1   | 0.9118                     | -0.0081       | 1 / 0.0081                    | 0 / 0                         | -     | -                          | 0.0000        | 0 / 0                         |
|                       | Total  | 28 / -                        |       |                            |               | 12 / -                        |       |                            |               | 124 / -                       | 8 / -                         |       |                            |               | 110 / -                       |
| D13S1275 <sup>a</sup> | 198    | 0 / 0                         | -     | -                          | 0.0000        | 0 / 0                         | -     | -                          | 0.0000        | 0 / 0                         | 0 / 0                         | 3     | 0.9322                     | -0.0092       | 1 / 0.0091                    |
|                       | 200    | 1 / 0.0357                    | 0.24  | 0.6441                     | 0.0036        | 0 / 0                         | 0.069 | 0.6881                     | -0.0333       | 4 / 0.0323                    | 0 / 0                         | -     | -                          | 0.0000        | 0 / 0                         |
|                       | 202    | 4 / 0.1429                    | 4.10  | <b>0.0177</b>              | -0.3454       | 1 / 0.0833                    | 2.7   | 0.0431                     | -0.4388       | 45 / 0.3629                   | 0 / 0                         | 0.62  | 0.2340                     | -0.2088       | 19 / 0.1727                   |
|                       | 204    | 0 / 0                         | 0.67  | 0.8158                     | -0.0081       | 0 / 0                         | 2.1   | 0.9118                     | -0.0081       | 1 / 0.0081                    | 0 / 0                         | 0.48  | 0.8086                     | -0.0280       | 3 / 0.0273                    |
|                       | 206    | 4 / 0.1429                    | 9.20  | <b>0.0042</b>              | 0.1359        | 0 / 0                         | 2.1   | 0.9118                     | -0.0081       | 1 / 0.0081                    | 0 / 0                         | 0.14  | 0.4123                     | -0.1224       | 12 / 0.1091                   |
|                       | 208    | 16 / 0.5714                   | 12.00 | <b>0.0005</b>              | 0.4029        | 10 / 0.8333                   | 13    | <b>0.0028</b>              | <b>0.7678</b> | 35 / 0.2823                   | 0 / 0                         | 8     | <b>0.0014</b>              | -1.3913       | 64 / 0.5818                   |
|                       | 210    | 0 / 0                         | 5.70  | <b>0.0028</b>              | -0.2653       | 1 / 0.0833                    | 0.45  | 0.2661                     | -0.1599       | 26 / 0.2097                   | 8 / 1                         | 51    | <b>&lt;10<sup>-7</sup></b> | <b>1.0000</b> | 7 / 0.0636                    |
|                       | 212    | 3 / 0.1071                    | 0.15  | 0.3284                     | 0.0456        | 0 / 0                         | 0.070 | 0.4678                     | -0.0690       | 8 / 0.0645                    | 0 / 0                         | 1.1   | 0.8685                     | -0.0185       | 2 / 0.0182                    |
|                       | 214    | 0 / 0                         | 0.096 | 0.4389                     | -0.0333       | 0 / 0                         | 0.069 | 0.6881                     | -0.0333       | 4 / 0.0323                    | 0 / 0                         | 1.1   | 0.8685                     | -0.0185       | 2 / 0.0182                    |
|                       | Total  | 28 / -                        |       |                            |               | 12 / -                        |       |                            |               | 124 / -                       | 8 / -                         |       |                            |               | 110 / -                       |
| D13S292 <sup>a</sup>  | 205    | 16 / 0.5714                   | 23.00 | <b>&lt;10<sup>-6</sup></b> | <b>0.4790</b> | 0 / 0                         | 1.4   | 0.1089                     | -0.2157       | 22 / 0.1774                   | 0 / 0                         | 0.31  | 0.3288                     | -0.1579       | 12 / 0.1364                   |
|                       | 207    | 0 / 0                         | 8.00  | <b>&lt;10<sup>-5</sup></b> | -0.3626       | 0 / 0                         | 2.9   | 0.0302                     | -0.3626       | 33 / 0.2661                   | 0 / 0                         | 1.4   | 0.1137                     | -0.3333       | 22 / 0.25                     |
|                       | 209    | 6 / 0.2143                    | 0.17  | 0.3478                     | -0.0825       | 11 / 0.9167                   | 18    | <b>&lt;10<sup>-4</sup></b> | <b>0.8852</b> | 34 / 0.2742                   | 3 / 0.375                     | 0.25  | 0.2912                     | 0.1912        | 20 / 0.2273                   |
|                       | 211    | 6 / 0.2143                    | 0.25  | 0.3166                     | -0.0947       | 1 / 0.0833                    | 1.3   | 0.1212                     | -0.2772       | 35 / 0.2823                   | 5 / 0.625                     | 0.88  | 0.1734                     | 0.3889        | 34 / 0.3864                   |
|                       | Total  | 28 / -                        |       |                            |               | 12 / -                        |       |                            |               | 124 / -                       | 8 / -                         |       |                            |               | 88 / -                        |

<sup>a</sup> - Designation of the STR allele corresponds to its size in nucleotides; the maximum indices of linkage disequilibrium ( $\delta$ ) and statistically significant ( $p < 0.05$ ) differences in allele frequencies between the c.516G>C, c.-23+1G>A, c.235delC homozygotes and the control samples are in bold.
