# Supplementary material for: High Rates of Three Common GJB2 Mutations c.516G>C, c.-23+1G>A, c.235delC in Deaf Patients from Southern Siberia Are Due to the Founder Effect
Source: MDPI journal article supplement (doi:10.3390/genes11070833), 2020-07-21
Supplement: s1 [file s1]

**Table S1.** Primer sequences and methods for STRs and SNPs genotyping.

| STRs                                     | Primer sequences <sup>a</sup>                                                                                                                                   | Methods of detection                                   |
|------------------------------------------|-----------------------------------------------------------------------------------------------------------------------------------------------------------------|--------------------------------------------------------|
| D13S1316                                 | F: 5'-CTACTGGGGAGGCTGG-3' (NED)<br>R: 5'-CATGTCTCTGAATCGCTTTT-3'                                                                                                | Fragment analysis<br>(500 LIZ)                         |
| D13S141                                  | F: 5'-GTCCTCCCGGCCTAGTCTTA-3'<br>R: 5'-ACCACGGAGCAAAGAACAGA-3' (6-FAM)                                                                                          |                                                        |
| D13S175                                  | F: 5'-TATTGGATACTTGAATCTGCTG-3'<br>R: 5'-TGCATCACCTCACATAGGTTA-3' (PET)                                                                                         |                                                        |
| D13S1853                                 | F: 5'-TGTACATCTCTTCTTACATTTCATGT-3'<br>R: 5'-CAGACTGGCACAACCTTAACTG-3' (6-FAM)                                                                                  |                                                        |
| D13S143                                  | F: 5'-CTCATGGGCAGTAACAACAAAA-3'<br>R: 5'-CTTATTTCTCTAGGGGCCAGCT-3' (VIC)                                                                                        |                                                        |
| D13S1275                                 | F: 5'-ATCACTTGAATAAGAAGCCATTTG-3'<br>R: 5'-CCAGCATGACCTTTACCAG-3' (VIC)                                                                                         |                                                        |
| D13S292                                  | F: 5'-TAATGGCGGACCATGC-3' (PET)<br>R: 5'-TTTGACACTTTCCAAGTTGC-3'                                                                                                |                                                        |
| SNPs                                     | Primer sequences                                                                                                                                                | Methods of detection                                   |
| rs2274083<br>rs2274084                   | 835-F: 5'-TGCTTGCTTACCCAGACTCA-3'<br>835-R: 5'-CCTCATCCCTCTCATGCTGT-3'<br>or<br>CX26-F: 5'-TCTTTTCCAGAGCAAACCGC-3'<br>CX26-R: 5'-CTGGGCAATGCGTTAACTGG-3'        | Sanger sequencing                                      |
| rs1411911768<br>rs9552101<br>rs117685390 | Ex1-F: 5'-TCTTTTCCAGAGCAAACCGC-3'<br>Ex1-R: 5'-CTGGGCAATGCGTTAACTGG-3'<br>or<br>Ex1-792-F: 5'-GCGTTCGTTCCGATTGGT-3'<br>Ex1-2239-R: 5'-CGGAAACAGACCCTCGTGAAGT-3' | Sanger sequencing                                      |
| rs747931                                 | F: 5'-TCGGCACCCCTACCTCCT-3'<br>R: 5'-TCAGACGACCAACCACCTAA-3'                                                                                                    | PCR-RFLP analysis ( <i>Pst</i> I)                      |
| rs5030700<br>rs3751385                   | F: 5'-GGCTGGTGAAGTGCAACG-3'<br>R: 5'-GTAAGCAAACAACTTTTGAAGTAG-3'                                                                                                | Sanger sequencing<br>PCR-RFLP analysis ( <i>Nhe</i> I) |
| rs877098                                 | F: 5'-ATGAGTATGGCAGATGATGTTATT-3'<br>R: 5'-CAAAAGTGGGCAAAGGTTTA-3'                                                                                              | PCR-RFLP analysis ( <i>Eco</i> RI)                     |
| rs11147592                               | F 5'-GATTTCAGTGGCTTCCCTTT-3'<br>R 5'-CCAGGTCATACACCTTCTACA-3'                                                                                                   | Sanger sequencing                                      |
| rs9509086                                | F 5'-GTCTTCCGCAGAATCCTATCAG-3'<br>R 5'-GGCTGTGGTCGTTGTCTCT-3'                                                                                                   | Sanger sequencing                                      |

<sup>a</sup> - Primer sequences for STRs genotyping were taken from the NCBI Probe Database (<http://www.ncbi.nlm.nih.gov/probe>) and the Ensembl Genome browser (<http://www.ensembl.org>). One from each primer pairs was marked with the different fluorescent dyes.
